# Supplementary material for: Probiotic coated with glycol chitosan/alginate relieves oxidative damage and gut dysmotility induced by oxytetracycline in zebrafish larvae
Source: Royal Society of Chemistry journal article supplement (doi:10.1039/d2fo01511k), 2022-01-01
Supplement: d2fo01511k1.pdf [file d2fo01511k1.pdf]

1 **Supplemental Information**

2 **Probiotic coated with glycol chitosan/alginate relieves**  
3 **oxidative damage and gut dysmotility induced by**  
4 **oxytetracycline in zebrafish larvae**

5 Ju Wang <sup>a</sup>, Lei Wang <sup>a</sup>, Shengnan Shi <sup>a</sup>, Yaqi Cao <sup>a</sup>, Junmei Feng <sup>a</sup>,

6 Changhong Liu <sup>a\*</sup>, Lei Zheng <sup>a,b\*</sup>

7 <sup>a</sup> Engineering Research Center of Bio-Process, Ministry of Education,  
8 School of Food and Biological Engineering, Hefei University of  
9 Technology, Hefei, 230009, China

10 <sup>b</sup> Intelligent Interconnected Systems Laboratory of Anhui Province, Hefei  
11 University of Technology, Hefei, 230009, China

12 **Table Captions**

13 **Table S1** RT-PCR amplified primers.

Table S1. RT-PCR amplified primers

| Gene name               | Forward (5'-3')           | Reverse (5'-3')          |
|-------------------------|---------------------------|--------------------------|
| <i>β-Actin</i>          | GGTATGGGACAGAAAGACAG      | AGAGTCCATCACGATAACCAG    |
| <i>CAT</i>              | AGGGCAACTGGGATCTTACA      | TTTATGGGACCAGACCTTGG     |
| <i>SOD</i>              | GTCCGCACTTCAACCCTCA       | TCCTCATTGCCACCCTTCC      |
| <i>GPx</i>              | AGGCACAACAGTCAGGGATT      | CAGGAACGCAAACAGAGGG      |
| <i>Nrf2</i>             | TCGGGTTTGTCCCTAGATG       | AGGTTTGGAGTGTCCGCTA      |
| <i>TPH-1A</i>           | TTCAAGGACAATGTCTATCG      | GGGAGTCGCAGTGTTTGATG     |
| <i>TPH-1B</i>           | CCTCTGCTGCTGAAAACCTG      | ATCAGAGGGGAGAGGAGGT<br>T |
| <i>TPH-2</i>            | GAAGCATGTGAATTTGGCGC      | TTCCTTCCCCATCTGGCAAT     |
| <i>5-HT<sub>R</sub></i> | ATGAGGATGAGCGGGATGTA<br>G | CAATCAGCCAGGACCACG       |
